# Supplementary material for: Evaluation of soil moisture in CMIP5 simulations over contiguous United States using in situ and satellite observations
Source: Copernicus journal article supplement (doi:10.5194/hess-2016-477), 2016-11-09
Supplement: Supplementary file [file hess-2016-477-AC2-supplement.pdf]

Tab.1. Comparison of precipitation between CRU and different scenarios.

| Precipitation (mm) | CRU TS2.2 | RCP2.6      | RCP4.5       | RCP8.5 |
|--------------------|-----------|-------------|--------------|--------|
| Mean               | 70.1      | <b>72.8</b> | <b>72.8</b>  | 75.9   |
| Stand Deviation    | 13.47     | 10.86       | <b>11.62</b> | 9.33   |
